# Supplementary material for: Evidence of strong hydrogen bonding by 8-aminoguanine
Source: Royal Society of Chemistry journal article supplement (doi:10.1039/b818409g), 2008-12-01
Supplement: b818409g.pdf [file b818409g.pdf]

## Supporting Information

### Evidence of Strong Hydrogen Bonding by 8-Amino-Guanine

Nicholas V. Hud and Aaron E. Engelhart  
School of Chemistry and Biochemistry  
Georgia Institute of Technology  
Atlanta, GA 30332, U.S.A.  
Fax: (+1) 404-894-7452  
E-mail: hud@chemistry.gatech.edu

Thomas Hellman Morton  
Department of Chemistry  
University of California  
Riverside, California 92521-0403

**S1-2:** Coordinates for Hoogsteen paired, hemiprotonated 8-aminoguanine homodimer and proton shift transition state.

**S3:** Experimental details

**S4:** Thermal denaturation studies of TX<sub>4</sub>T, reversibility, and ion dependence

**S5:** Thermal denaturation of TG<sub>4</sub>T

**S6:** CD spectra of TX<sub>4</sub>T and TG<sub>4</sub>T

**S7:** NMR of TX<sub>4</sub>T in D<sub>2</sub>O

### Hoogsteen Proton-Bound Homodimer of 8-aminoguanine

Stoichiometry C10H13N12O2(1+)  
Framework group C1[X(C10H13N12O2)]  
Deg. of freedom 105  
Full point group C1 NOP 1

Standard orientation:

| Center<br>Number | Atomic<br>Number | Atomic<br>Type | Coordinates (Ångstroms) |           |           |
|------------------|------------------|----------------|-------------------------|-----------|-----------|
|                  |                  |                | X                       | Y         | Z         |
| 1                | 6                | 0              | -5.194368               | -0.219603 | -0.101662 |
| 2                | 7                | 0              | -4.326756               | -1.285710 | -0.104282 |
| 3                | 6                | 0              | -2.916710               | -1.205681 | -0.034956 |
| 4                | 6                | 0              | -2.478046               | 0.141658  | 0.027503  |
| 5                | 6                | 0              | -3.443728               | 1.143922  | 0.019074  |
| 6                | 7                | 0              | -4.782420               | 1.030940  | -0.033376 |
| 7                | 8                | 0              | -2.270777               | -2.268357 | -0.041514 |
| 8                | 7                | 0              | -1.197771               | 0.695061  | 0.093198  |
| 9                | 7                | 0              | -2.739164               | 2.324242  | 0.087080  |
| 10               | 6                | 0              | -1.392666               | 2.005719  | 0.134204  |
| 11               | 1                | 0              | -3.149691               | 3.244692  | 0.146319  |
| 12               | 1                | 0              | -4.677322               | -2.232007 | -0.197881 |
| 13               | 7                | 0              | -0.437955               | 2.954305  | 0.266257  |
| 14               | 1                | 0              | -0.658696               | 3.897801  | -0.012889 |
| 15               | 1                | 0              | 0.535024                | 2.670762  | 0.135534  |
| 16               | 6                | 0              | 2.499706                | -0.103587 | 0.004215  |
| 17               | 6                | 0              | 3.415411                | -1.138504 | 0.026919  |
| 18               | 7                | 0              | 2.672879                | -2.308178 | 0.095743  |
| 19               | 6                | 0              | 1.337616                | -1.990705 | 0.110269  |
| 20               | 7                | 0              | 1.213907                | -0.655077 | 0.056025  |
| 21               | 1                | 0              | 3.063163                | -3.239255 | 0.122642  |
| 22               | 6                | 0              | 2.963316                | 1.238419  | -0.075715 |
| 23               | 8                | 0              | 2.338247                | 2.298134  | -0.114486 |
| 24               | 7                | 0              | 4.383450                | 1.262037  | -0.117386 |
| 25               | 1                | 0              | 4.768894                | 2.196129  | -0.200741 |
| 26               | 7                | 0              | 0.343150                | -2.865882 | 0.177481  |
| 27               | 1                | 0              | -0.653217               | -2.559885 | 0.107822  |
| 28               | 1                | 0              | 0.542868                | -3.853498 | 0.177579  |
| 29               | 6                | 0              | 5.211491                | 0.166002  | -0.085208 |
| 30               | 7                | 0              | 4.753135                | -1.073623 | -0.007788 |
| 31               | 1                | 0              | 0.284016                | -0.124487 | 0.069040  |
| 32               | 7                | 0              | 6.544305                | 0.373788  | -0.164564 |
| 33               | 1                | 0              | 7.138589                | -0.434062 | -0.057448 |
| 34               | 1                | 0              | 6.955312                | 1.284458  | -0.038544 |
| 35               | 7                | 0              | -6.523267               | -0.486188 | -0.221713 |
| 36               | 1                | 0              | -7.133085               | 0.308049  | -0.093472 |
| 37               | 1                | 0              | -6.892198               | -1.382755 | 0.055459  |

Rotational constants (GHZ): 0.5638194 0.1152244 0.0958313

Standard basis: 6-31G(d,p) (6D, 7F)

There are 425 symmetry adapted basis functions of A symmetry.

SCF Done: E(RB+HF-LYP) = -1196.33343039 -V/T = 2.0092

# Proton shift TS in Hoogsteen Proton-Bound Homodimer of 8-aminoguanine

Stoichiometry C10H13N12O2(1+)  
Framework group C2[C2(H),X(C10H12N12O2)]  
Deg. of freedom 53  
Full point group C2 NOP 2

Standard orientation:

| Center<br>Number | Atomic<br>Number | Atomic<br>Type | Coordinates (Ångstroms) |           |           |
|------------------|------------------|----------------|-------------------------|-----------|-----------|
|                  |                  |                | X                       | Y         | Z         |
| 1                | 6                | 0              | -0.152426               | 5.146374  | -0.172773 |
| 2                | 7                | 0              | -1.241504               | 4.314492  | -0.261215 |
| 3                | 6                | 0              | -1.218490               | 2.900420  | -0.173316 |
| 4                | 6                | 0              | 0.108142                | 2.423230  | 0.001839  |
| 5                | 6                | 0              | 1.135363                | 3.352851  | 0.079576  |
| 6                | 7                | 0              | 1.073999                | 4.691699  | 0.009664  |
| 7                | 8                | 0              | -2.290137               | 2.287297  | -0.257879 |
| 8                | 7                | 0              | 0.636963                | 1.129555  | 0.121132  |
| 9                | 7                | 0              | 2.290137                | 2.618098  | 0.252186  |
| 10               | 6                | 0              | 1.955763                | 1.282488  | 0.268782  |
| 11               | 1                | 0              | 3.216609                | 3.008319  | 0.347308  |
| 12               | 1                | 0              | -2.167195               | 4.693400  | -0.425970 |
| 13               | 7                | 0              | 2.855400                | 0.306478  | 0.451741  |
| 14               | 1                | 0              | 3.835044                | 0.536225  | 0.388679  |
| 15               | 1                | 0              | 2.595485                | -0.664199 | 0.215887  |
| 16               | 6                | 0              | -0.108142               | -2.423230 | 0.001839  |
| 17               | 6                | 0              | -1.135363               | -3.352851 | 0.079576  |
| 18               | 7                | 0              | -2.290137               | -2.618098 | 0.252186  |
| 19               | 6                | 0              | -1.955763               | -1.282488 | 0.268782  |
| 20               | 7                | 0              | -0.636963               | -1.129555 | 0.121132  |
| 21               | 1                | 0              | -3.216609               | -3.008319 | 0.347308  |
| 22               | 6                | 0              | 1.218490                | -2.900420 | -0.173316 |
| 23               | 8                | 0              | 2.290137                | -2.287297 | -0.257879 |
| 24               | 7                | 0              | 1.241504                | -4.314492 | -0.261215 |
| 25               | 1                | 0              | 2.167195                | -4.693400 | -0.425970 |
| 26               | 7                | 0              | -2.855400               | -0.306478 | 0.451741  |
| 27               | 1                | 0              | -2.595485               | 0.664199  | 0.215887  |
| 28               | 1                | 0              | -3.835044               | -0.536225 | 0.388679  |
| 29               | 6                | 0              | 0.152426                | -5.146374 | -0.172773 |
| 30               | 7                | 0              | -1.073999               | -4.691699 | 0.009664  |
| 31               | 1                | 0              | 0.000000                | 0.000000  | 0.112242  |
| 32               | 7                | 0              | 0.356795                | -6.478780 | -0.317385 |
| 33               | 1                | 0              | -0.440657               | -7.071328 | -0.141219 |
| 34               | 1                | 0              | 1.270303                | -6.886189 | -0.195273 |
| 35               | 7                | 0              | -0.356795               | 6.478780  | -0.317385 |
| 36               | 1                | 0              | 0.440657                | 7.071328  | -0.141219 |
| 37               | 1                | 0              | -1.270303               | 6.886189  | -0.195273 |

Rotational constants (GHZ): 0.5684964 0.1181191 0.0985323

Standard basis: 6-31G(d,p) (6D, 7F)

There are 213 symmetry adapted basis functions of A symmetry.

There are 212 symmetry adapted basis functions of B symmetry.

SCF Done: E(RB+HF-LYP) = -1196.32944490 -V/T = 2.0092

## Experimental Details

### DNA Preparation

DNA was prepared on an Expedite Synthesizer using standard protocols. Deprotection was performed over 20 hr in concentrated aqueous ammonia with 2-mercaptoethanol as recommended by the manufacturer for the 8-amino-dG phosphoramidite (Glen Research).

Full length DNA was separated from truncation products by PAGE, excised from the gel and extracted by the crush-and-soak method. Desalting was effected by SPE. The identity of the oligonucleotide was confirmed by ESI-MS: found  $m/z=1922$  (M-H), expected  $m/z=1922$ .

Solid phase extraction was performed on an ODS Sep-Pak Plus (Waters). The following solutions were pulled through the bed using a peristaltic pump at 1 ml/min. 10mL 100% MeCN; 10 ml 50% MeCN, 50% 100mM triethylammonium acetate, pH 7 (TEAA); 100% TEAA; and the salt-containing DNA in ca. 50mL TEAA. The bed was then washed twice with 5 ml portions of nanopure water. The DNA was then eluted with 5mL 40% aqueous acetonitrile, the volume was reduced by half on a vacuum centrifuge, and the remaining organic-depleted fraction was frozen and lyophilized.

The purified DNA was resuspended in nanopure and equilibrated over >100 equivalents of lithium sulfonate resin (Dowex 50X8). The resin was washed several times with nanopure water and the lithium-exchanged DNA was concentrated two-fold and then lyophilized.

### Sample Preparation

The buffers used were 10 mM acetate or cacodylate with 100 mM metal chloride and were prepared at the desired pH at 5-10 $\times$ . All samples were placed in boiling water for 5 min and annealed at 5 $\times$  final concentration (50  $\mu$ M total oligonucleotide, 50 mM buffer, 500 mM salt) at 4 $^{\circ}$ C overnight.

### Circular Dichroism

CD was performed on a JASCO J-810, at 10  $\mu$ M total oligonucleotide, 10 mM buffer, 100 mM salt with 350-200 nm scans and 1 $^{\circ}$ C steps, with a temperature ramp rate of 0.16 $^{\circ}$ C - 1 $^{\circ}$ C/min. The full-wavelength spectrum at each temperature was fit to a two-state model, using the assumption that the 5 $^{\circ}$ C spectrum in the first heating corresponded to 100% duplex and the 60 $^{\circ}$ C spectrum corresponded to 0% duplex.

### NMR

$^1$ H-NMR spectra were collected on a Bruker DRX-500 at 275K (H<sub>2</sub>O) or 280K (D<sub>2</sub>O) and were the sum of 1024 transients. Spectra in 10% D<sub>2</sub>O were observed using a 3-9-19 WATERGATE pulse sequence. Those in D<sub>2</sub>O were 99.96% D and observed using a presaturation pulse.

### Circular Dichroism Studies of TX<sub>4</sub>T Thermal Denaturation, Reversibility, and Ion Dependence

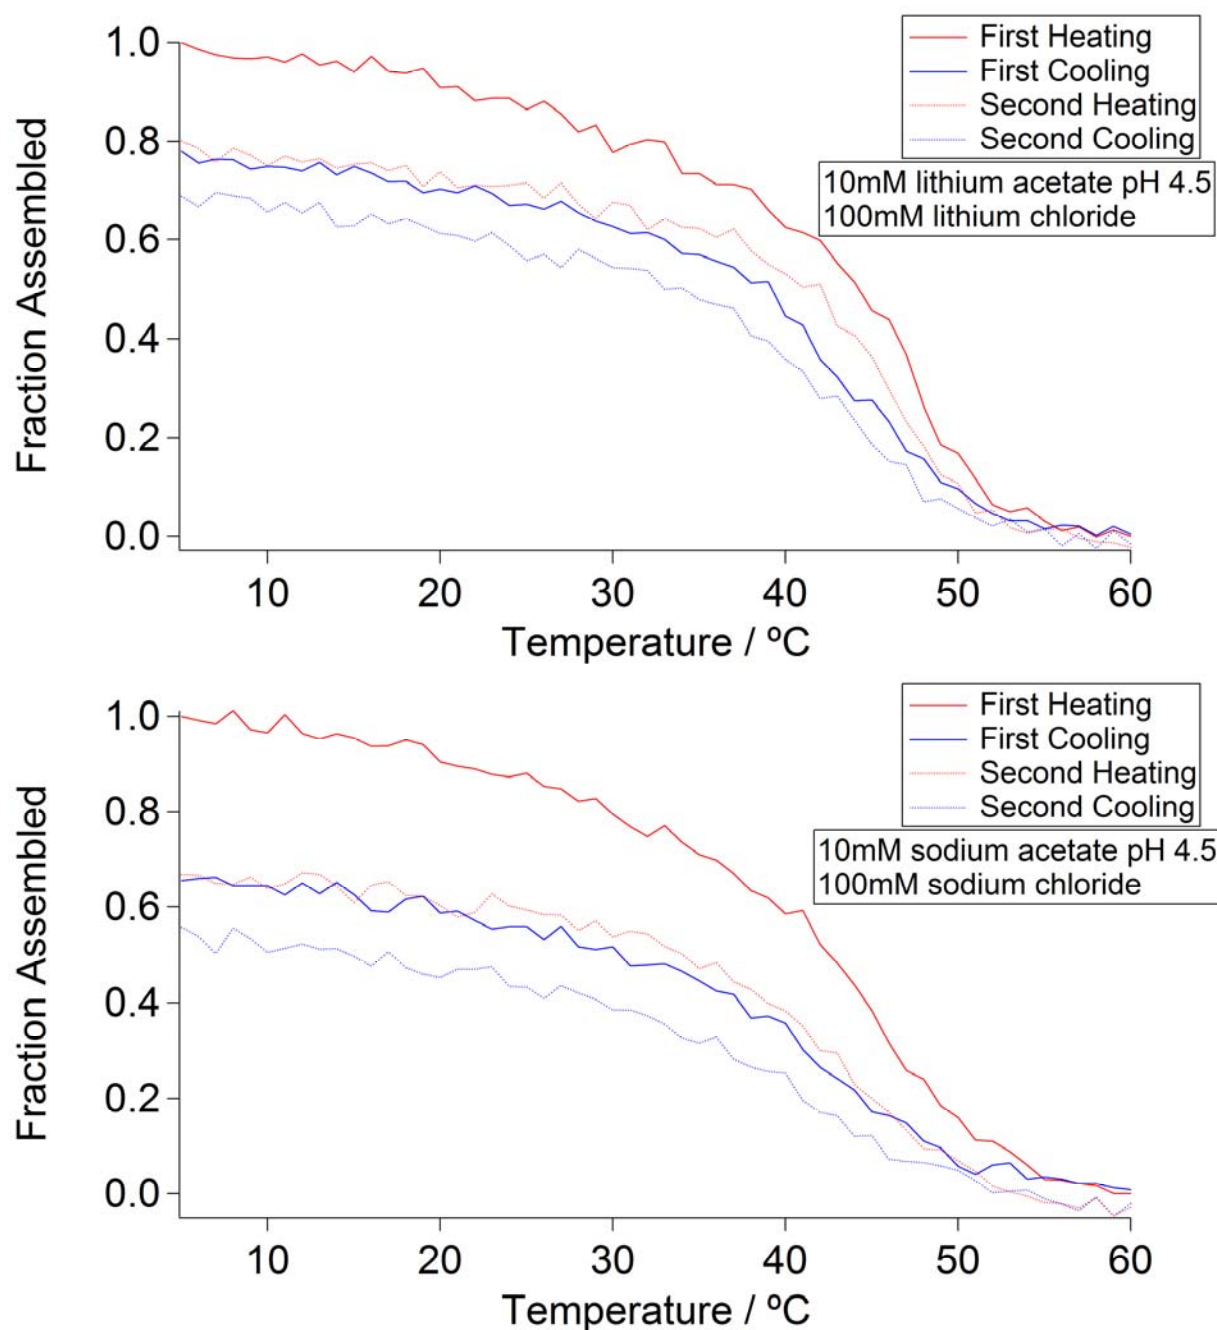

The partial loss of spectral intensity observed is not due to irreversible dissociation of a secondary structure, but, likely, partial depurination of dX residues. Extended heating resulted in further loss of ellipticity, supporting this hypothesis. The reaction appears to be salt-catalyzed, based on the cation dependence and lack of depurination in the salt-free NMR samples.

### Circular Dichroism Studies of Thermal Denaturation of TG<sub>4</sub>T

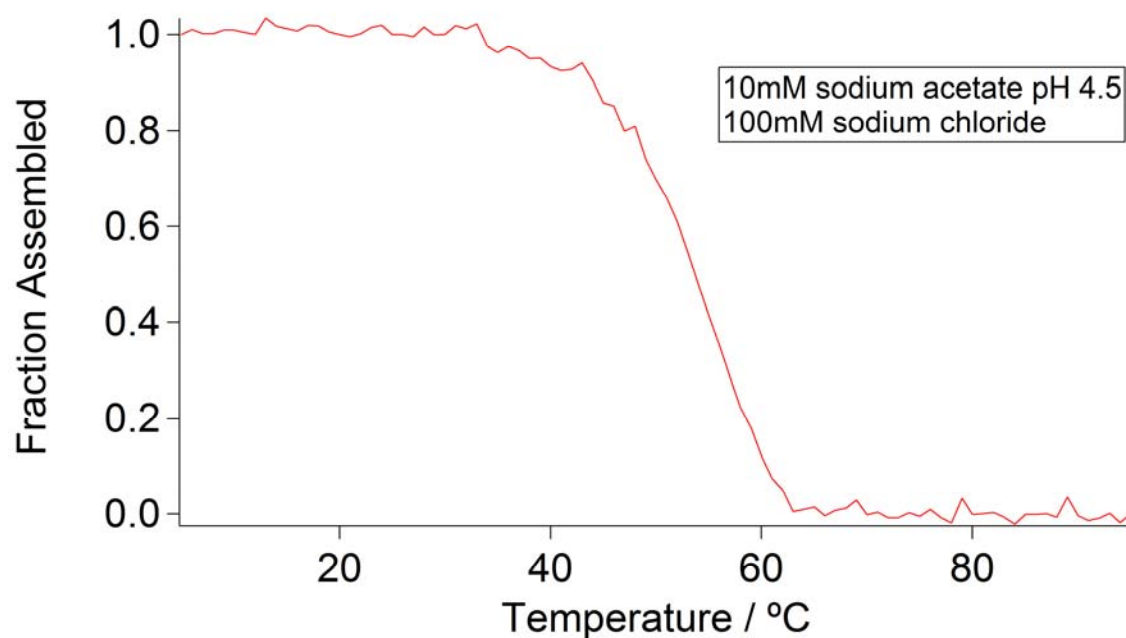

Irreversible changes in the CD spectrum persisted even after overnight incubation at 5°C, due to the slow, tetramolecular association of the G-quadruplex.

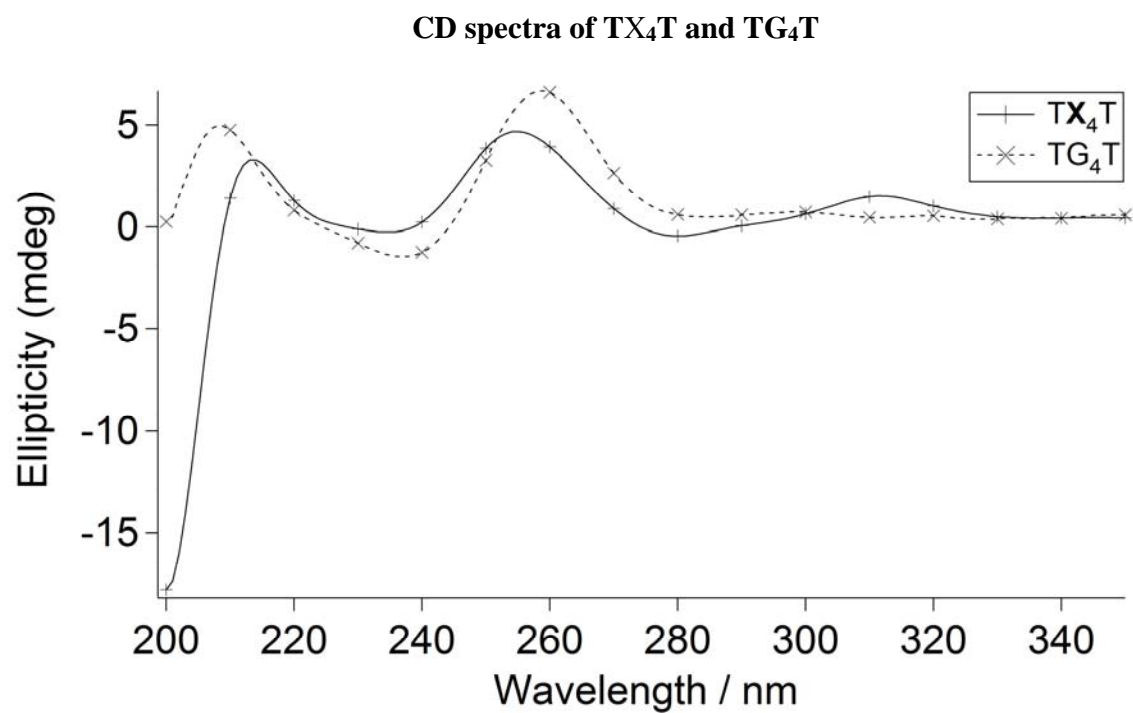

Spectra were acquired at 278 K. Information on oligonucleotide and buffer concentrations is given above.

**$^1\text{H}$  NMR of TX<sub>4</sub>T in D<sub>2</sub>O**

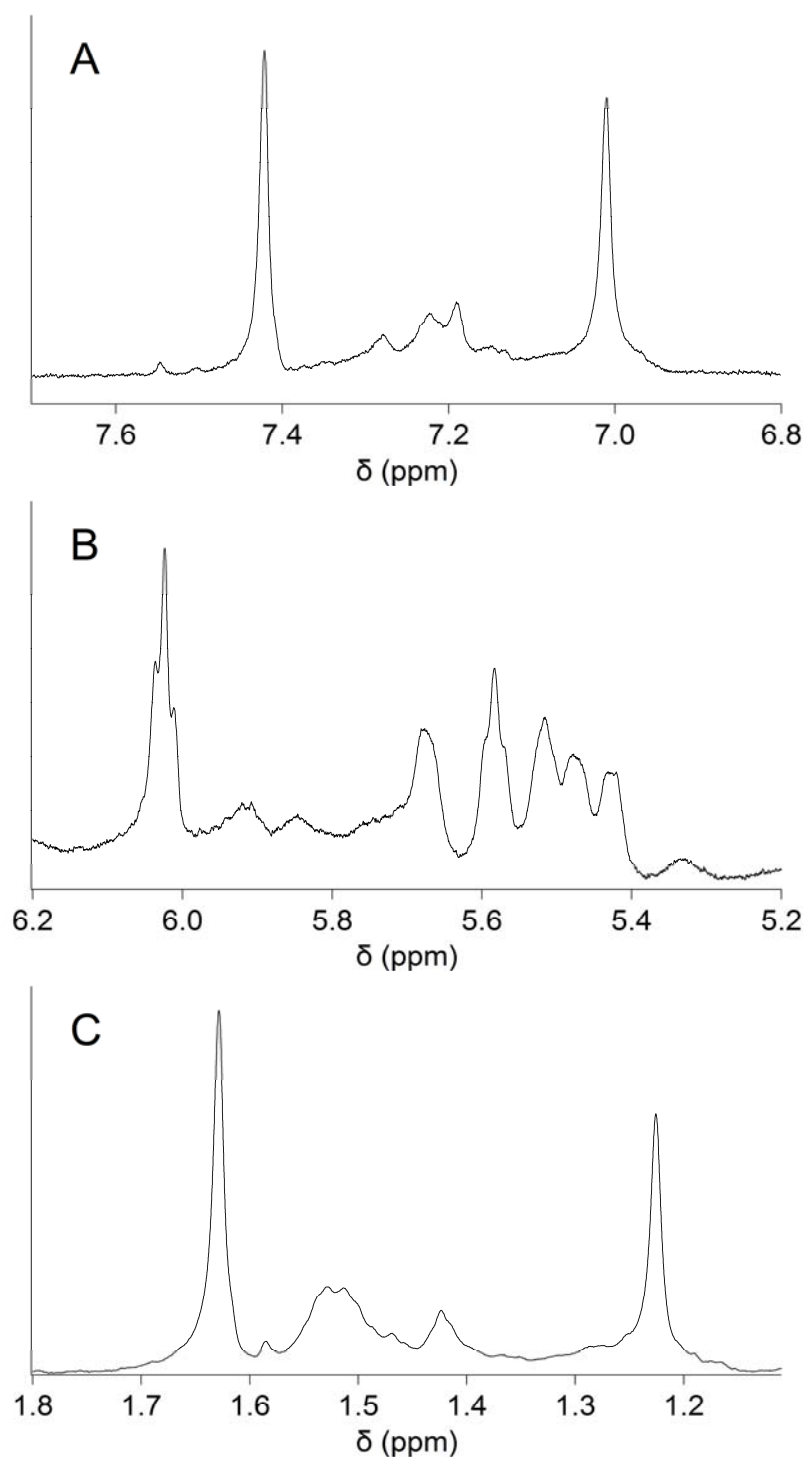

Consistent with a single predominant structure, two major aromatic (T1 and T6 H6) resonances (**A**), six H1' resonances (**B**), and two methyl (T1 and T6 H5) resonances (**C**) are observed. 1mM lithium-exchanged TX<sub>4</sub>T with no added salt in 99.96% D<sub>2</sub>O, 280K, pD 5
